# Supplementary material for: Base recognition by l-nucleotides in heterochiral DNA
Source: Royal Society of Chemistry journal article supplement (doi:10.1039/c2ra01013e), 2012-01-01
Supplement: c2ra01013e1.pdf [file c2ra01013e1.pdf]

## Electronic supplementary information

### **Base recognition by L-nucleotides in heterochiral DNAs**

Shuji Ogawa, Shun-ichi Wada and Hidehito Urata\*

*Osaka University of Pharmaceutical Sciences, 4-20-1 Nasahara, Takatsuki, Osaka  
569-1094, Japan*

**26 March 2019**

Note added after first publication: This Supplementary Information file replaces that originally published on 6 February 2012. The original version of Table S1 contained some incorrect nucleotide sequences in error. The correct sequences are provided in this updated version.

#### **Table of Contents**

|                                                                         |    |
|-------------------------------------------------------------------------|----|
| 1. General methods .....                                                | S2 |
| 2. Synthesis and MALDI-TOF mass analyses of oligodeoxynucleotides ..... | S2 |
| 3. UV-melting experiments .....                                         | S2 |
| 4. Table S1 (Melting temperature of mismatched duplexes) .....          | S3 |
| 5. References .....                                                     | S4 |

### 1. General methods

Commercially available reagents were used without further purification. L-Nucleotides and their 5'-*O*-dimethoxytrityl-3'-(2-cyanoethyl)-*N,N*-diisopropylphosphoramidite derivatives were synthesized according to a previously reported procedure.<sup>1</sup> HPLC analyses were performed on a Shimadzu LC-10A system. A  $\mu$ Bondasphere C18 5 $\mu$ m 100Å column (3.9×150 mm, Waters) was used with a linear gradient of acetonitrile in 50 mM triethylammonium acetate (TEAA, pH 7.0). Matrix-assisted laser desorption/ionization time-of-flight (MALDI TOF) mass spectra were acquired on a Voyager-DE™ STR (Applied Biosystems) with 3-hydroxypicolinic acid as the matrix.

### 2. Oligonucleotide synthesis and characterization with MALDI-TOF mass spectrometry

Oligodeoxyribonucleotides were synthesized on an Applied Biosystems model 392 automated DNA/RNA synthesizer. Reagents for the synthesis were purchased from Applied Biosystems Japan.

d(AAATCTGCG); m/z calcd for C<sub>88</sub>H<sub>113</sub>N<sub>35</sub>O<sub>51</sub>P<sub>8</sub> ([M+H]<sup>+</sup>), 2723.82, found: 2723.43;  
d(CGCAGATTT); m/z calcd for C<sub>88</sub>H<sub>113</sub>N<sub>32</sub>O<sub>53</sub>P<sub>8</sub> ([M+H]<sup>+</sup>), 2714.80, found: 2714.51;  
d(AALATCTGCG); m/z calcd for C<sub>88</sub>H<sub>113</sub>N<sub>35</sub>O<sub>51</sub>P<sub>8</sub> ([M+H]<sup>+</sup>), 2723.82, found: 2724.36;  
d(AAATCTLGCG); m/z calcd for C<sub>88</sub>H<sub>113</sub>N<sub>35</sub>O<sub>51</sub>P<sub>8</sub> ([M+H]<sup>+</sup>), 2723.82, found: 2723.53;  
d(AAATLCTGCG); m/z calcd for C<sub>88</sub>H<sub>113</sub>N<sub>35</sub>O<sub>51</sub>P<sub>8</sub> ([M+H]<sup>+</sup>), 2723.82, found: 2723.12;  
d(AAALTCTGCG); m/z calcd for C<sub>88</sub>H<sub>113</sub>N<sub>35</sub>O<sub>51</sub>P<sub>8</sub> ([M+H]<sup>+</sup>), 2723.82, found: 2722.57;  
d(CGCAGAATT); m/z calcd for C<sub>88</sub>H<sub>112</sub>N<sub>35</sub>O<sub>51</sub>P<sub>8</sub> ([M+H]<sup>+</sup>), 2723.82, found: 2723.77;  
d(CGCAGAGTT); m/z calcd for C<sub>88</sub>H<sub>112</sub>N<sub>35</sub>O<sub>52</sub>P<sub>8</sub> ([M+H]<sup>+</sup>), 2739.82, found: 2739.98;  
d(CGCAGACTT); m/z calcd for C<sub>87</sub>H<sub>112</sub>N<sub>33</sub>O<sub>52</sub>P<sub>8</sub> ([M+H]<sup>+</sup>), 2699.79, found: 2699.59;  
d(CGAAGATTT); m/z calcd for C<sub>89</sub>H<sub>113</sub>N<sub>34</sub>O<sub>52</sub>P<sub>8</sub> ([M+H]<sup>+</sup>), 2738.83, found: 2738.04;  
d(CGGAGATTT); m/z calcd for C<sub>89</sub>H<sub>113</sub>N<sub>34</sub>O<sub>53</sub>P<sub>8</sub> ([M+H]<sup>+</sup>), 2754.83, found: 2754.55;  
d(CGTAGATTT); m/z calcd for C<sub>89</sub>H<sub>114</sub>N<sub>31</sub>O<sub>54</sub>P<sub>8</sub> ([M+H]<sup>+</sup>), 2729.82, found: 2729.14;  
d(CGCAAATTT); m/z calcd for C<sub>88</sub>H<sub>113</sub>N<sub>32</sub>O<sub>52</sub>P<sub>8</sub> ([M+H]<sup>+</sup>), 2698.81, found: 2697.01;  
d(CGCACATTT); m/z calcd for C<sub>87</sub>H<sub>113</sub>N<sub>30</sub>O<sub>53</sub>P<sub>8</sub> ([M+H]<sup>+</sup>), 2674.78, found: 2673.62;  
d(CGCATATTT); m/z calcd for C<sub>88</sub>H<sub>114</sub>N<sub>29</sub>O<sub>54</sub>P<sub>8</sub> ([M+H]<sup>+</sup>), 2689.79, found: 2688.94;  
d(CGCAGGTTT); m/z calcd for C<sub>88</sub>H<sub>113</sub>N<sub>32</sub>O<sub>54</sub>P<sub>8</sub> ([M+H]<sup>+</sup>), 2730.80, found: 2729.11;  
d(CGCAGCTTT); m/z calcd for C<sub>87</sub>H<sub>113</sub>N<sub>30</sub>O<sub>54</sub>P<sub>8</sub> ([M+H]<sup>+</sup>), 2690.78, found: 2690.25;  
d(CGCAGTTTT); m/z calcd for C<sub>87</sub>H<sub>114</sub>N<sub>29</sub>O<sub>55</sub>P<sub>8</sub> ([M+H]<sup>+</sup>), 2705.79, found: 2704.63

### 3. Melting experiments

The concentrations of oligonucleotide solutions were calculated by using the equation and coefficients described by Bore.<sup>2</sup> The coefficients of the heterochiral oligomer were

assumed to be the same as those of the corresponding homochiral oligomer. Duplex solutions (6 mM) in 10 mM MgCl<sub>2</sub>, 100 mM NaCl, and 70 mM MOPS (pH 7.1) were heated at 90 °C and cooled gradually to room temperature. Melting curves were measured at least twice at 270 nm on a JASCO V-560 spectrophotometer equipped with a programmable temperature control unit. The temperature was raised at a rate of 0.5°C/min and  $T_m$  values were obtained from the first-derivative plots of the melting curves.

4. Table S1. Melting temperature of mismatched homo- and heterochiral duplexes.<sup>a</sup>

| complementary strand  |       | homo- and heterochiral strand   |         |                                 |         |
|-----------------------|-------|---------------------------------|---------|---------------------------------|---------|
|                       |       | d(AA <b>D</b> A <b>T</b> CTGCG) |         | d(AA <b>L</b> A <b>T</b> CTGCG) |         |
| d(CGCAGAXTT)          | X = A | 27.6 ± 0.0                      | (-14.5) | 26.0 ± 0.4                      | (-7.6)  |
|                       | X = G | 31.8 ± 0.4                      | (-10.3) | 29.2 ± 0.2                      | (-4.4)  |
|                       | X = C | 27.3 ± 0.3                      | (-14.8) | 27.7 ± 0.5                      | (-5.9)  |
|                       | X = T | 42.1 ± 0.3                      | F.M.    | 33.6 ± 0.2                      | F.M.    |
|                       |       | d(AAATCT <b>D</b> GCG)          |         | d(AAATCT <b>L</b> GCG)          |         |
| d(CG <b>X</b> AGATTT) | X = A | 22.1 ± 0.1                      | (-20.0) | 19.3 ± 0.3                      | (-13.3) |
|                       | X = G | 22.5 ± 0.1                      | (-19.6) | 31.6 ± 0.4                      | (-1.0)  |
|                       | X = C | 42.1 ± 0.3                      | F.M.    | 32.6 ± 0.4                      | F.M.    |
|                       | X = T | 25.0 ± 0.2                      | (-17.1) | 22.4 ± 0.4                      | (-10.2) |
|                       |       | d(AAAT <b>D</b> CTGCG)          |         | d(AAAT <b>L</b> CTGCG)          |         |
| d(CGCAXATTT)          | X = A | 16.4 ± 0.0                      | (-25.7) | 13.8 ± 0.2                      | -24.4   |
|                       | X = G | 42.1 ± 0.3                      | F.M.    | 38.2 ± 0.2                      | F.M.    |
|                       | X = C | 13.6 ± 0.2                      | (-28.5) | 9.9 ± 0.1                       | (-28.3) |
|                       | X = T | 18.2 ± 0.2                      | (-23.9) | 13.7 ± 0.1                      | (-24.5) |
|                       |       | d(AAA <b>D</b> TCTGCG)          |         | d(AAA <b>L</b> TCTGCG)          |         |
| d(CGCAGXTTT)          | X = A | 42.1 ± 0.3                      | F.M.    | 33.9 ± 0.1                      | F.M.    |
|                       | X = G | 31.3 ± 0.1                      | (-10.8) | 25.7 ± 0.5                      | (-8.2)  |
|                       | X = C | 22.2 ± 0.2                      | (-19.9) | 20.7 ± 0.5                      | (-13.2) |
|                       | X = T | 26.4 ± 0.2                      | (-15.7) | 26.9 ± 0.1                      | (-7.0)  |

<sup>a</sup>Samples contained 6 μM duplex in 10 mM MgCl<sub>2</sub>, 100 mM NaCl, and 70 mM MOPS (pH 7.1). Melting points are the average of at least two measurements ± standard deviation. Melting point differences from the fully matched (F. M.) duplex are shown in parenthesis.

5. *References.*

1. H.Urata, E. Ogara, K. Shinohara, Y. Ueda, and M. Akagi, *Nucleic Acids Res.*, 1992, **20**, 3325
2. P.N Bore, Optical properties of nucleic acids, in: G.D. Fasman (Ed.), *Handbook of Biochemistry and Molecular Biology, third ed, Nucleic acid, vol. 1*, CRC Press, Boca Raton, FL, 1975, p589
